# Supplementary material
Source: publisher figshare collection journal article supplement (https://gsapubs.figshare.com/ndownloader/files/35940374)
Supplement: Supplementary file 1 [file 35940374]

## Sheet: Table 2
SUPPLEMENTAL TABLE 2. POLLEN COUNTS FOR KG SAMPLES
KG smple #	Height above base of setion (m)	Pinus	Cupressaceae	Quercus	Alnus	Juglans	Rhamnaceae, Anaccardiaceae, Rosacea	Asteraceae	Amaranthaceae	Poaceae	Carya	Ulmus	Locally Extinct	Total
12	515	69	5	13	2	4.5	8	29	14	2.5	3	1	0	147
7	354	38	14	22	0	2	6	11	4	2	1	0	1	99
5	324	72	13	1	0	0	2	3	2	2	0	0	1	95
30	280	42	15	17	2	3	19	8	2	2	1	0	0	110
31	275	15	25	42	2	5	4	6	5	4	0	3	2	108
32	241	26	15	15	3	0	11	9	1	1	0	0	1	81
33	255	25	4	4	0	2	5	5	2	0	4	2	1	47
1	257	69	8	19	1	1	4		4	2	3	1	0	108
41	185	44	0.5	22	0	1	7	1	0	0	4	1	1	75.5
39	107	12	13	14	1	5	7	2	11	2	6	4	5	67
38	97	39	20	32	1	7	13	10	7	4	2	0	2	133
11	86	61	13	39	1	3	5	4	5	1	19	4	8	132
10	86	51	11	23	1	3	2	0	3	0	8	1	5	94
36	84	44	7	28	0	1	8	4	4	1	8	0	1	97
35	71	47	11	20	1	2	6	6	1	3	6	1	1	97
9	-47	53	14	23	2	7	4	1	3	0	20	2	5	107

## Sheet: Info
This Supplemental Material accompanies Heusser, L.E., Barron, J.A., Blake, G.H., and Nichols, J.,
2022, Miocene terrestrial paleoclimates inferred from pollen in the Monterey Formation, Naples
Coastal Bluffs section, California, in Aiello, I., Barron, J., and Ravelo, C., eds., Understanding
the Monterey Formation and Similar Biosiliceous Units across Space and Time: Geological
Society of America Special Paper 556, https://doi.org/10.1130/2022.2556(09).
